# Supplementary material for: Computational metabolic engineering strategies for growth-coupled biofuel production by Synechocystis
Source: PubMed Central journal article supplement — Metab Eng Commun. 2016 Jul 20;3:216–26. doi: 10.1016/j.meteno.2016.07.003 (PMC5779732; doi:10.1016/j.meteno.2016.07.003), 2016-07-20
Supplement: mmc1.pdf [file mmc1.pdf]

Supporting Information for:

**Computational metabolic engineering strategies for growth-coupled biofuel production by *Synechocystis***

Kiyan Shabestary and Paul Hudson

Supplementary Note 1: Tradeoffs between growth and production in simulated batch culture

Supplementary Note 2: Comparison between metabolic models

Table S1. Abbreviations used in this study

Table S2. Modifications brought to iJN678 according to current literature

Table S3. Heterologous biofuel reactions added to iJN678

Table S4. Reactions added to iJN678 for alkanes production

Table S5. Reaction KOs added to M1 mutant to reproduce coupling in the model from Knoop et al.

Table S6. Reaction KOs to get M4 mutant

Fig. S1. Flux map of mutant M2 compared to iJN678\_ButFER

Fig. S2. PPP for M1 knockouts applied to 1-hexanol and 1-octanol produced through reverse beta-oxidation

Fig. S3. Predicted titers of 1-butanol from batch culture

Fig. S4. Flux map of mutant M3 compared to iJN678\_ButFA

Fig. S5. PPP for M3 knockouts applied to longer fatty-acid derived alcohols

Fig. S6. PPP for M3 knockouts applied to longer fatty-acid derived alkanes

Fig. S7. PPP for M3 with PPS used as ATP wasting mechanism

Fig. S8. PPP for M3 with GLNS used as ATP wasting mechanism

Fig. S9. PPP for M4 for limonene production

For following Supplementary files, see <http://shabestary2016.sourceforge.net>

A file of OptGene mutants and corresponding BPCY (.xls)

A MATLAB script containing: modifications to the model iJN678, all reactions for biofuel production, execution of OptKnock, and calculation of flux distributions

An SBML of updated iJN678

OptFlux files containing reaction subsets (A, B, and C) considered for OptGene

## Supplemental Note 1: Tradeoffs between growth and production in simulated batch culture

In the identified mutant strains, fixed carbon is partitioned between biomass and biofuel and this partition will affect overall titers obtained from a starting culture. While a strictly-inducible biofuel strain is beneficial for laboratory studies, growth-coupled strains would be useful for industrial applications where large amounts of inducer or large liquid handling (for media switching) may be prohibitively expensive. To explore the biofuel/biomass tradeoff, we simulated growth and butanol production from mutant strains to estimate total titers from a typical batch culture. The starting cell density was “dilute,” at 2 mg DCW/L ( $OD_{730}=0.01$ ). At these low cell densities we assume that there is no shading of light and that cells are not carbon limited, so that growth rate is constant (steady-state) and maximal, and that cells produce butanol at the rate predicted by FBA. Simulated exponential cell growth curves under these assumptions were similar to those observed experimentally. Details on these calculations are provided in Supplementary. In the simulation, the M1 mutant culture accumulated 150 mg/L butanol after 4 days. By forcing flux through the soluble transhydrogenase reaction, the growth-coupling strength was altered. We re-computed the predicted 1-butanol titers after 4 days for various  $S_{th}$  fluxes (**Fig. S3**). The highest final titer after 4 days (200 mg/L) was predicted for a strain with weak growth-butanol coupling. This indicates that a severely restricted butanol envelope may not give highest titers in batch culture.

FBA calculations imply steady-state, which is assumed under constant growth rate. Titters can only be calculated for this time interval obtained using the following equation.

$$OD(t) = OD_0 \cdot e^{\mu t}$$

Cultures are started for a typical  $OD_0$  value of 0.01 until they reach  $OD_5$  corresponding to the start of the stationary phase. From that, a time interval in which growth is constant can be determined and used for titer calculations.

The productivity under constant growth was calculated as the integral of the specific productivity times the cell density over time as following:

$$P = \int_0^T r_p \cdot \alpha \cdot OD_0 e^{\mu t} dt = \frac{r_p}{\mu} \cdot \alpha \cdot OD_0 (e^{\mu T} - 1)$$

T is the final time of cultivation in hours,  $r_p$  the specific productivity in mmol/gCDW/h and  $\alpha$  the conversion factor from OD to a concentration value gCDW/L (0.21 for shake flasks). During day 1, we assume no butanol production corresponding to the lag phase. Titters in Fig. S3 were calculated for 4 days to remain in the constant growth rate range.

## Supplemental Note 2: Comparison between metabolic models

There are multiple variants of the *Synechocystis* GEM and developing intervention strategies in one GEM may not be effective in another. Our intervention strategies were derived using the iJN678 model (Nogales et al., 2012) which we updated with current literature. When we transferred the M1 knockouts to the GEM developed by Knoop et al (Knoop et al., 2013), coupling between biomass and butanol was lost and further knockouts were required to regain coupling. A main difference between the two models is a reversible transhydrogenase reaction in the model of Knoop et al. These must be disabled in order to achieve butanol coupling through the But\_FER pathway since transhydrogenase provides an NADH valve to NADPH. However, due to a general abundance of NADPH relative to NADH, we expect net flux from the transhydrogenase reaction to lie toward NADH generation, which appears to be borne out in practice (Angermayr et al., 2012). However, the activity of the transhydrogenase (*slr1239* and *slr1434*) in cyanobacteria has not been demonstrated.

Alternative co-factor usage for several reactions leads to additional knockout targets. For example, glycerol 3-phosphate dehydrogenase (G3PD2) catalyzes the irreversible reduction of DHAP to glycerol 3-phosphate using NADH in both models. In iJN678, a reverse reaction is catalyzed by G3PD and re-generates DHAP by oxidizing glycerol 3-phosphate with FAD. Since FAD is a rather constrained metabolite, this potential “NADH burning” cycle between DHAP and glycerol 3-phosphate carries low flux and is not a knockout target. In the model of Knoop, G3PD uses plastoquinone (PQ) to oxidize glycerol 3-phosphate. The resultant PQH<sub>2</sub> is in turned linked to many reactions such that PQH<sub>2</sub> can be easily dissipated. Therefore, the irreversible G3PD2 catalyzed reaction in the model of Knoop becomes a knockout target to prevent an NADH “burning” cycle. The actual cofactor preferences of G3PD is not known, but has a Rossmann-fold NAD(P)H/FAD binding domain (NCBI BLAST), suggesting that FAD could be a co-factor. In all, 2 additional reactions were targeted for knockout to achieve butanol-growth coupling in the model of Knoop et al. (**Table S5**).

**Table S1: Abbreviations used**

|              |                                                             |
|--------------|-------------------------------------------------------------|
| 13DPG        | 1,3-diphosphoglycerate, 3-phospho-D-glyceroyl phosphate     |
| 2PG          | 2-phosphoglycerate, D-glycerate 2-phosphate                 |
| 2PGlyc       | 2-phosphoglycolate                                          |
| 3HB          | (R)-3-hydroxybutyryl-CoA                                    |
| 3PG          | 3-phosphoglycerate, D-glycerate 3-phosphate                 |
| $\alpha$ -KG | $\alpha$ -ketoglutarate, 2-oxoglutarate                     |
| AaCoA        | acetoacetyl-CoA                                             |
| Ac           | acetate                                                     |
| AcACP        | acetyl-ACP                                                  |
| Acald        | acetaldehyde                                                |
| AcCoA        | acetyl-CoA                                                  |
| Actp         | acetyl phosphate                                            |
| Ala          | L-alanine                                                   |
| ARTO         | alternative respiratory terminal oxidase                    |
| CDP-ME       | 4-(cytidine 5'-diphospho)-2-C-methyl-D-erythritol           |
| CDP-MEP      | 2-phospho-4-(cytidine 5'-diphospho)-2-C-methyl-D-erythritol |
| Cit          | citrate                                                     |
| DHAP         | dihydroxyacetone phosphate                                  |
| DMAPP        | dimethylallyl diphosphate                                   |
| DXP          | 1-deoxy-D-xylulose 5-phosphate                              |
| E4P          | D-erythrose 4-phosphate                                     |
| EtOH         | ethanol                                                     |
| F6P          | D-fructose 6-phosphate                                      |
| FBP          | D-fructose 1,6-bisphosphate                                 |
| Flv2/Flv4    | flavodiiron proteins 2 & 4                                  |
| Fum          | fumarate                                                    |
| G1P          | D-glucose 1-phosphate                                       |
| G3P          | D-glucose 3-phosphate                                       |
| G6P          | D-glucose 6-phosphate                                       |
| GDP          | geranyl diphosphate                                         |
| Glu          | L-glutamate                                                 |
| Gln          | L-glutamine                                                 |
| HMBPP        | 1-hydroxy-2-methyl-2-(E)-butenyl 4-diphosphate              |
| Icit         | isocitrate                                                  |
| IPP          | isopentenyl diphosphate                                     |
| Lac          | lactate                                                     |
| Mal          | malate                                                      |
| MalCoA       | malonyl-CoA                                                 |
| ME-cPP       | 2-C-methyl-D-erythritol 2,4-cyclodiphosphate                |
| MEP          | 2-C-methyl-D-erythritol 4-phosphate                         |
| OcACP        | octanoyl-ACP                                                |
| PEP          | phosphoenolpyruvate                                         |
| PHB          | polyhydroxybutyrate                                         |
| PSP          | 3-phosphoserine phosphatase                                 |
| PSTA         | phosphoserine transaminase                                  |
| Pyr          | pyruvate                                                    |
| R5P          | $\alpha$ -D-ribose 5-phosphate                              |
| Ru5P         | D-ribulose 5-phosphate                                      |
| RuBP         | D-ribulose 1,5-bisphosphate                                 |
| S17BP        | sedoheptulose 1,7-bisphosphate                              |
| S7P          | sedoheptulose 7-phosphate                                   |
| Succ         | succinate                                                   |

|        |                        |
|--------|------------------------|
| Sucsal | succinic semialdehyde  |
| SucCoA | succinyl-CoA           |
| X5P    | D-xylulose 5-phosphate |

Abbreviations for reaction names used in iJN678 can be found in those authors supplementary files (Nogales et al., 2012; Dataset\_S01)

**Table S2.** Reactions added to iJN678 according to current literature.

| Modified iJN678 |                        |              |                                                |
|-----------------|------------------------|--------------|------------------------------------------------|
| Pathway         | Ref                    | Reaction     | Modification                                   |
| SSDH shunt      | Zhang and Bryant, 2011 | SSDH_shunt   | akg[c] -> succal[c] + co2[c]                   |
|                 |                        | ABTA         | Set to 0                                       |
| FPK             | Xiong et al., 2015     | FPK          | f6p[c] + pi[c] -> actp[c] + e4p[c] + h2o[c]    |
| Serine          | Klemke et al., 2015    | PSTA         | 3php[c] + glu-L[c] -> 3ps[c] + oaa[c]          |
|                 |                        | PSP          | 3ps[c] -> ser-L[c] + pi[c]                     |
| ETC             | Lea-Smith et al., 2015 | NDH2_2p      | h[c] + nadh[c] + pq[p] -> nad[c] + pqh2[p]     |
|                 |                        | ARTO         | pqh2[p] + 0.5 o2[p] + 2 h[c] -> pq[p] + h2o[p] |
|                 |                        | Flv2/Flv4    | pqh2[u] + 0.5 o2[u] + 2 h[c] -> pq[u] + h2o[u] |
|                 |                        | CBFCpp       | Set to 0                                       |
|                 |                        | CBFC2pp      | Set to 0                                       |
|                 |                        | CYO1b2pp_syn | Set to 0                                       |
|                 |                        | CYO1bpp_syn  | Set to 0                                       |
|                 |                        | CYO1b2_syn   | Set to 0                                       |
|                 |                        | NDH1_2p      | Set to 0                                       |
|                 |                        | NDH1_1p      | Set to 0                                       |

**Table S3.** Reactions added to iJN678 to create iJN678\_But\_FER, iJN678\_Oct\_FA, and iJN678\_Limonene.

| <b>But_FER</b>                        |                                                                                      |
|---------------------------------------|--------------------------------------------------------------------------------------|
| <i>Enzyme(s)</i>                      | <i>Reaction*</i>                                                                     |
| PhaA ( <i>native</i> )                | 2 accoa[c] -> aacoa[c] + coa[c]                                                      |
| NphT7<br>(only present in<br>variant) | mal-coa[c] + accoa[c] + atp[c] -> aacoa[c] + co2[c] + coa[c]<br>+ amp[c] + ppi[c]    |
| PhaB ( <i>native</i> )                | h[c] + nadph[c] + aacoa[c] -> nadp[c] + 3hbcoa-R[c]                                  |
| PhaI                                  | 3hbcoa-R[c] -> crotonyl-coa[c] + h2o[c]                                              |
| Ter                                   | crotonyl-coa[c] + nadh[c] + h[c] -> butyryl-coa[c] + nad[c]                          |
| AdhE2 / Bldh                          | butyryl-coa[c] + nadh[c] + h[c] -> butyrald[c] + nad[c] +<br>coa[c]                  |
| AdhE2 / YqhD                          | butyrald[c] + nadh[c] + h[c]-> 1-butanol[c] + nad[c]                                 |
| <b>Oct_FA</b>                         |                                                                                      |
| <i>Enzyme(s)</i>                      | <i>Reaction</i>                                                                      |
| Tes                                   | octanyl-acp[c] + h2o[c] -> octanoate[c] + acp[c] + h[c]                              |
| Car                                   | octanoate[c] + nadph[c] + h[c] + atp[c] -> octanal[c] +<br>nadp[c] + amp[c] + ppi[c] |
| AdhA ( <i>native</i> ) / Ahr          | octanal[c] + nadph[c] + h[c] -> 1-octanol[c] + nadp[c]                               |
| <b>Limonene</b>                       |                                                                                      |
| LS                                    | grdp[c] -> limonene[c] + ppi[c]                                                      |

\*[c] cytoplasmic compartment in iJN678

**Table S4.** Reactions added to iJN678 for alkanes production.

|        |                                                                                                                    |
|--------|--------------------------------------------------------------------------------------------------------------------|
| AAR C8 | ocACP + NADPH + H <sup>+</sup> -> octanal + NADP <sup>+</sup>                                                      |
| ADO C8 | octanal + 2 NADPH + 2 h <sup>+</sup> + o <sub>2</sub> -> heptane + for + 2 NADP <sup>+</sup><br>+ h <sub>2</sub> o |



**Table S5.** Reaction KOs added to M1 to achieve coupling in the model of Knoop et al.

| Reaction | Enzyme                             | Reaction                                                                                                  | Locus   |
|----------|------------------------------------|-----------------------------------------------------------------------------------------------------------|---------|
| R507     | Alanine dehydrogenase              | L-Alanine + NAD <sup>+</sup> + H <sub>2</sub> O <=><br>Pyruvate + NH <sub>3</sub> + NADH + H <sup>+</sup> | sl11682 |
| R263     | Glycerol 3-phosphate dehydrogenase | sn-Glycerol 3-phosphate + NAD <sup>+</sup> <=><br>Glycerone phosphate + NADH + H <sup>+</sup>             | slr1755 |

**Table S6.** Reaction KOs or upregulation for M4 mutant (limonene)

| Reaction name in iJN678 | Enzyme(s)                                      | Reaction*                                                                                  | Locus to target**                                 |
|-------------------------|------------------------------------------------|--------------------------------------------------------------------------------------------|---------------------------------------------------|
| NDH1_1u                 | NAD(P)H dehydrogenase NDH-1 (thylakoid)        | 4 h[c] + nadph[c] + pq[u] -> nadp[c] + 3 h[u] + pqh2[u]                                    | <i>slr0331 (ndhD1)</i> and <i>slr1291 (ndhD2)</i> |
| NDH1_2u                 | NAD(P)H dehydrogenase NDH-1 (thylakoid)        | 4 h[c] + nadh[c] + pq[u] -> nad[c] + 3 h[u] + pqh2[u]                                      | <i>slr0331 (ndhD1)</i> and <i>slr1291 (ndhD2)</i> |
| NDH2_syn                | NdbA, NdbB, NdbC (thylakoid)                   | h[c] + nadh[c] + pq[u] -> nad[c] + pqh2[u]                                                 | <i>slr0851, slr1743,</i> and <i>sl11484</i>       |
| NDH2_2p                 | NdbA, NdbB, NdbC (periplasm)                   | h[c] + nadh[c] + pq[p] -> nad[c] + pqh2[p]                                                 | <i>slr0851, slr1743,</i> and <i>sl11484</i>       |
| NDH1_3u                 | Active CO2 transporter facilitator (thylakoid) | 3 h[c] + h2o[c] + nadph[c] + pq[u] + co2[p] -> nadp[c] + hco3[c] + 3 h[u] + pqh2[u]        | <i>sl11733 (ndhD3)</i> and <i>sl10027 (ndhD4)</i> |
| NDH1_4pp                | Active CO2 transporter facilitator (periplasm) | 3 h[c] + h2o[c] + nadph[c] + pq[u] + co2[p] -> nadp[c] + hco3[c] + 3 h[u] + pqh2[u]        | <i>sl11733 (ndhD3)</i> and <i>sl10027 (ndhD4)</i> |
| Mehler                  | Flavodiiron proteins Flv1 and Flv3             | h[c] + 0.5 o2[c] + nadph[c] -> h2o[c] + nadp[c]                                            | <i>sl11521 (flv1),</i> <i>sl10550 (flv3)</i>      |
| Cyo1b_syn               | Cytochrome c oxidase                           | 4 h[c] + 2 focytc6[u] + 0.5 o2[u] -> 2 h[u] + 2 ficytc6[u] + h2o[u]                        | <i>slr1137</i>                                    |
| FQR                     | Cyclic Electron Flow                           | 2 h[c] + pq[u] + 2 fdxr-2:2[c] -> pqh2[u] + 2 fdxo-2:2[c]                                  | <i>ssr2016</i>                                    |
| GLYCTO1                 | Glycolate oxidase                              | o2[c] + glyclt[c] -> h2o2[c] + glx[c]                                                      | <i>sl10404 (glcD2)</i>                            |
| GLUDy                   | Glutamate dehydrogenase (NADP)                 | h2o[c] + nadp[c] + glu-L[c] <=> h[c] + nadph[c] + akg[c] + nh4[c]                          | <i>slr0710</i>                                    |
| ACKr                    | Acetate kinase                                 | atp[c] + ac[c] <=> adp[c] + actp[c]                                                        | <i>sl11299</i>                                    |
| H2ase_syn               | [NiFe] Hydrogenase                             | h[c] + nadph[c] <=> nadp[c] + h2[c]                                                        | <i>sl11224 (hoxY)</i>                             |
| FPK                     | Phosphoketolase                                | f6p[c] + pi[c] -> actp[c] + e4p[c] + h2o[c]                                                | <i>slr0453</i>                                    |
| CYPHYS                  | Cyanophycin synthetase                         | 2 atp[c] + asp-L[c] + arg-L[c] + precyanphy[c] -> 2 adp[c] + 2 h[c] + 2 pi[c] + cyanphy[c] | <i>slr2002</i>                                    |
| NADTRHD                 | NAD transhydrogenase                           | nad[c] + nadph[c] <=> nadp[c] + nadh[c]                                                    | <i>slr1239 (pntA)</i>                             |
| ATPS4rpp****            | ATP synthase (periplasmic)                     | 3 adp[c] + 3 pi[c] + 14 h[p] -> 3 atp[c] + 11 h[c] + 3 h2o[c]                              | <i>slr1330 (atpE)</i>                             |
| PGK***                  | Phosphoglycerate kinase                        | atp[c] + 3pg[c] <=> adp[c] + 13dpg[c]                                                      | <i>slr0394</i>                                    |
| PSII****                | Photosystem II                                 | 2 h[c] + pq[u] + h2o[u] + 2 photon[c] -> 2 h[u] + pqh2[u] + 0.5 o2[u]                      | <i>slr0906 (psbB)</i>                             |

\*[c] cytoplasmic, [u] thylakoid, [p] periplasmic compartments.

\*\*Locus to target is suggestion for gene deletion to eliminate enzyme activity. For multi-domain proteins a core subunit is given. NDH-1 (Battchikova, Eisenhut, & Aro, 2011), GlcD2 (Eisenhut et al., 2008), Hox (Eckert et al., 2012), AtpE (Imashimizu et al., 2011), PSII (Shen & Vermaas, 1994).

\*\*\*Overexpression required

\*\*\*\*Downregulation required

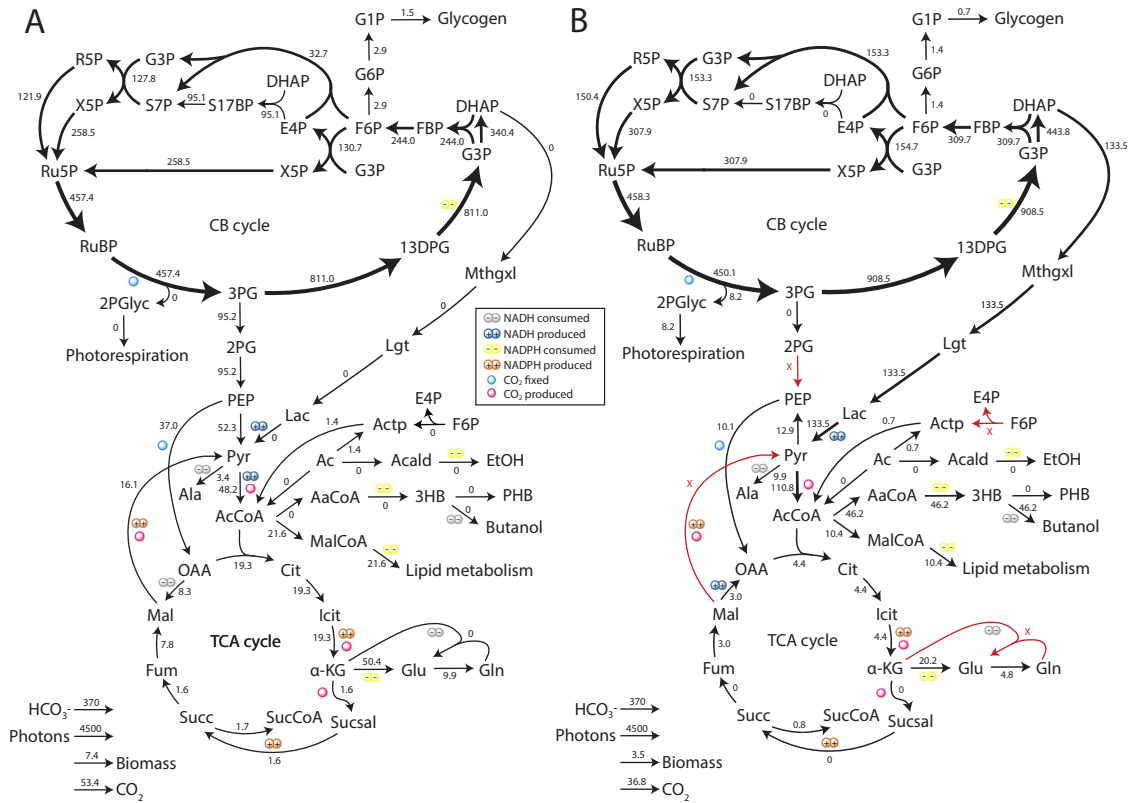

**Fig. S1. Flux distributions of iJN678\_ButFER and mutant M2.** Fluxes were calculated using FBA with a biomass formation objective function in light-limited condition (see Methods). A) iJN678\_But\_FER, B) mutant M2. Flux values are in mmol/gDW.h (\*10<sup>-2</sup>).

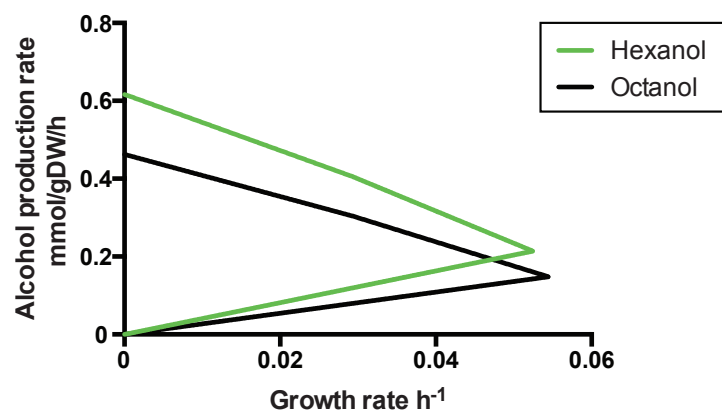

**Fig. S2. Production envelope of *Synechocystis* iJN678 mutants.** The respective reverse  $\beta$ -oxidation reactions were added (see MATLAB supplemental file) and the M1 reaction knockouts were applied.

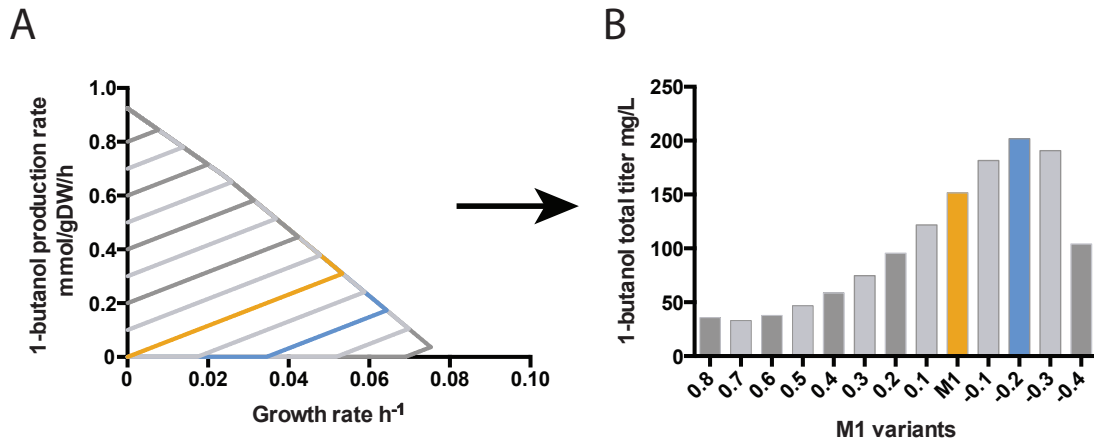

**Fig. S3. Simulation of growth and butanol production of M1 variants.** A) Production envelopes for fermentative butanol production by M1 and variants exhibiting forced flux through the Sth transhydrogenase reaction ( $\text{NADPH} + \text{NAD}^+ \rightarrow \text{NADH} + \text{NADP}^+$ ). The M1 variant is in orange. B) Simulated butanol titers for M1 variants after 4 days of batch culture. Starting cell density was  $\text{OD}_{730}=0.01$ , approximately 2 mgDW/L. Variants are indicated by their forced flux through the Sth transhydrogenase reaction (mmol/gDW/hr). Note M1 mutant has no flux through this reaction.

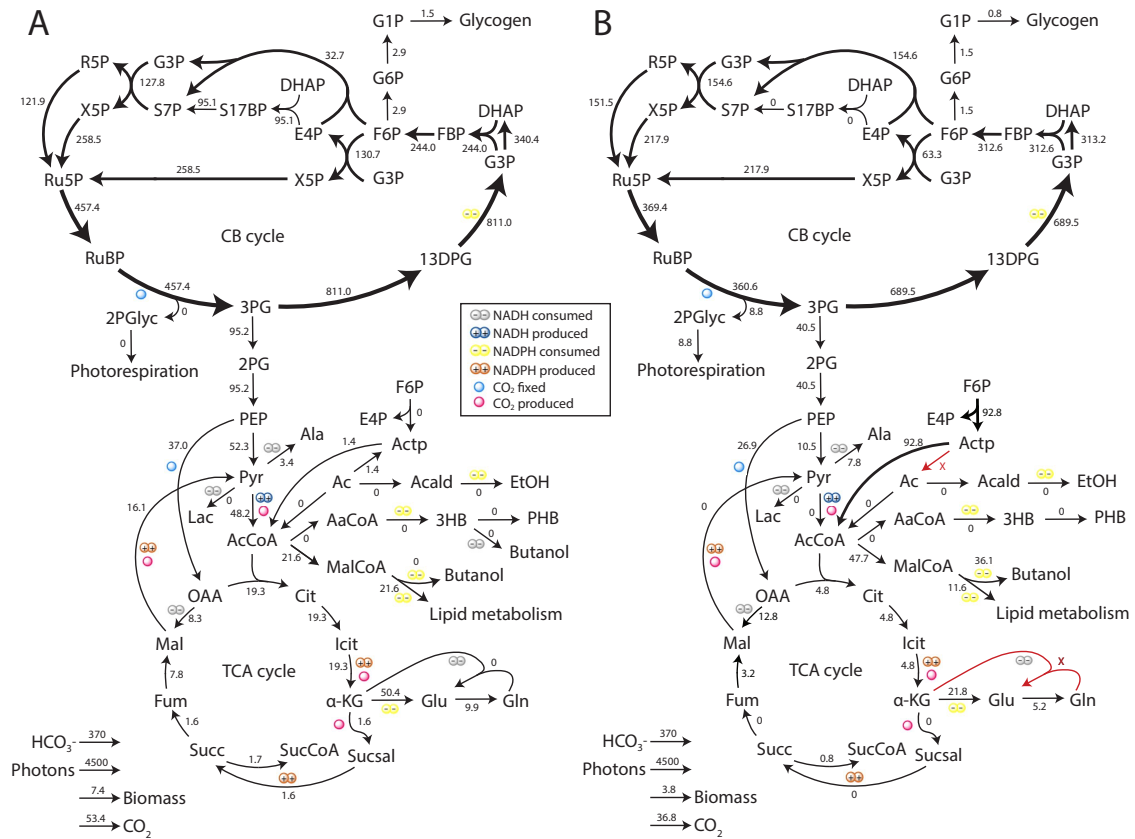

**Fig. S4. Flux distributions between iJN678\_ButFA and mutant M3.** Fluxes were calculated using FBA with a biomass formation objective function in light-limited condition (see Methods). A) iJN678\_ButFA, B) mutant M3. Flux values are in mmol/gDW.h (\*10<sup>-2</sup>).

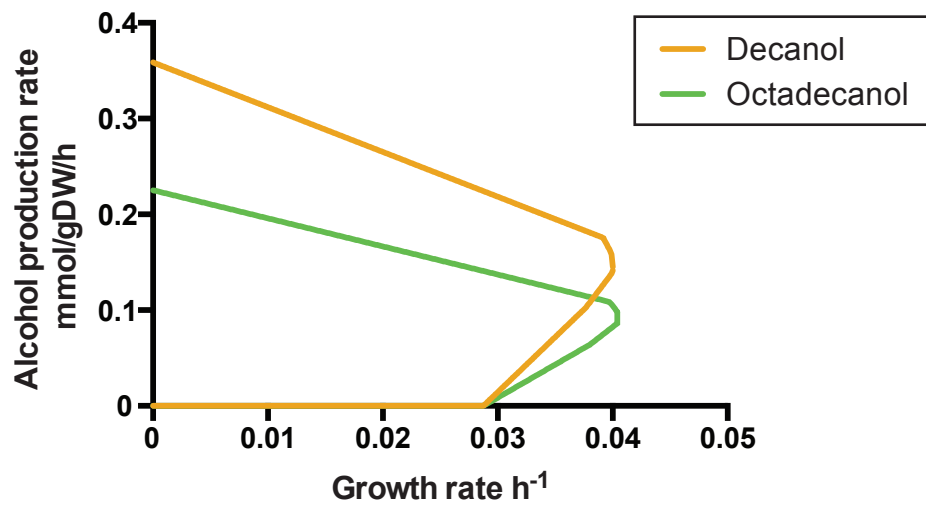

**Fig. S5. Production envelope of *Synechocystis* iJN678 mutants and fatty alcohol production.** The respective fatty alcohol reactions were added to the model (see supplemental MATLAB file). The M3 knockouts were applied.

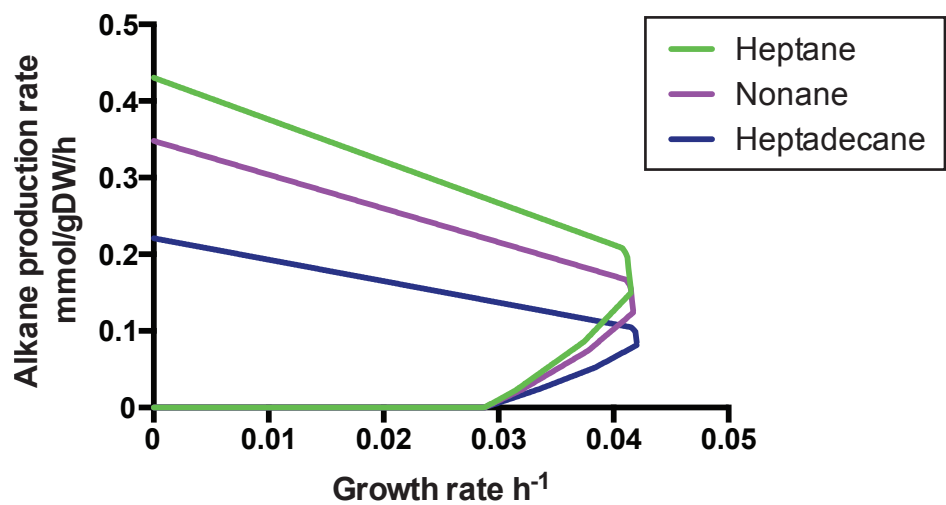

**Fig. S6. Production envelope of *Synechocystis* iJN678 mutants and fatty alkane production.** The respective fatty alcohol reactions were added to the model (see Supplemental MATLAB file). The M3 knockouts were applied.



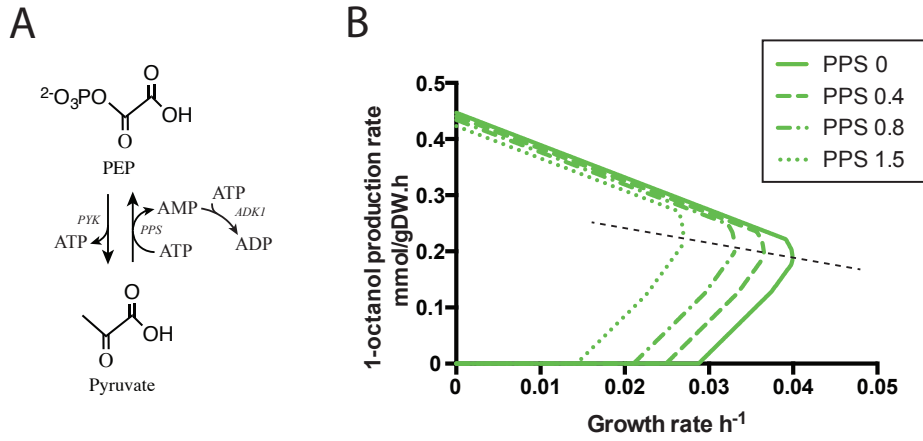

**Fig. S7. *In silico* mutants that couple growth and 1-octanol production. A)** A proposed futile cycle using PEP synthetase (PPS) in combination with pyruvate kinase (PYK) and adenylate kinase (ADK1) with a net consumption of one ATP. **B)** Forcing flux through the PPS reaction strengthens coupling in the M3 mutant.

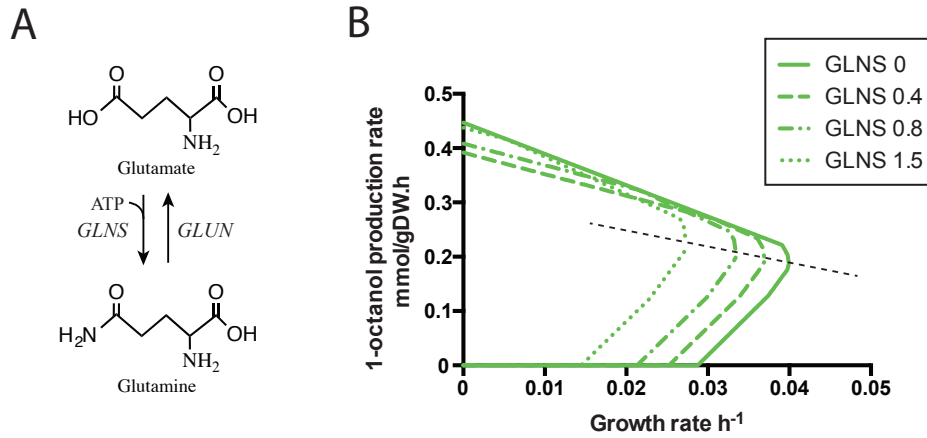

**Fig. S8. *In silico* mutants that couple growth and 1-octanol production. A)** A proposed futile cycle using glutamine synthase (GLNS) together with glutaminase (GLUN). **B)** Forcing flux through the GLNS reaction strengthens coupling in the M3 mutant.

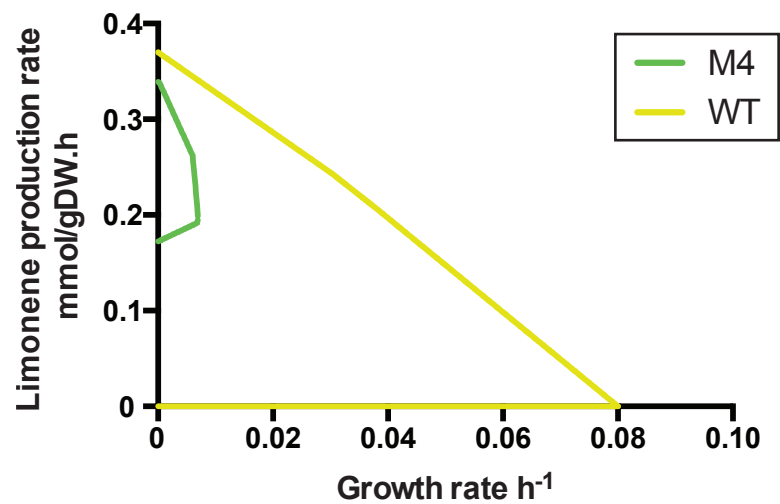

**Fig. S9. Production envelope for M4 mutant.** M4 mutant couples limonene to growth in iJN678\_Limonene.

## References

- Angermayr, S. A., Paszota, M., & Hellingwerf, K. J. (2012). Engineering a cyanobacterial cell factory for production of lactic acid. *Applied and Environmental Microbiology*, *78*(19), 7098–106. <http://doi.org/10.1128/AEM.01587-12>
- Battchikova, N., Eisenhut, M., & Aro, E. M. (2011). Cyanobacterial NDH-1 complexes: Novel insights and remaining puzzles. *Biochimica et Biophysica Acta - Bioenergetics*, *1807*(8), 935–944. <http://doi.org/10.1016/j.bbabi.2010.10.017>
- Eckert, C., Boehm, M., Carrieri, D., Yu, J., Dubini, A., Nixon, P. J., & Maness, P. C. (2012). Genetic analysis of the Hox hydrogenase in the cyanobacterium *Synechocystis* sp. PCC 6803 reveals subunit roles in association, assembly, maturation, and function. *Journal of Biological Chemistry*, *287*(52), 43502–43515. <http://doi.org/10.1074/jbc.M112.392407>
- Eisenhut, M., Ruth, W., Haimovich, M., Bauwe, H., Kaplan, A., & Hagemann, M. (2008). The photorespiratory glycolate metabolism is essential for cyanobacteria and might have been conveyed endosymbiotically to plants. *Proceedings of the National Academy of Sciences of the United States of America*, *105*(44), 17199–204. <http://doi.org/10.1073/pnas.0807043105>
- Imashimizu, M., Bernát, G., Sunamura, E., Broekmans, M., Konno, H., Isato, K., ... Hisabori, T. (2011). Regulation of F0F1-ATPase from *Synechocystis* sp. PCC 6803 by gamma and epsilon subunits is significant for light/dark adaptation. *The Journal of Biological Chemistry*, *286*(30), 26595–26602. <http://doi.org/10.1074/jbc.M111.234138>
- Knoop, H., Gründel, M., Zilliges, Y., Lehmann, R., Hoffmann, S., Lockau, W., & Steuer, R. (2013). Flux balance analysis of cyanobacterial metabolism: the metabolic network of *Synechocystis* sp. PCC 6803. *PLoS Computational Biology*, *9*(6), e1003081. <http://doi.org/10.1371/journal.pcbi.1003081>
- Nogales, J., Gudmundsson, S., Knight, E. M., Palsson, B. O., & Thiele, I. (2012). Detailing the optimality of photosynthesis in cyanobacteria through systems biology analysis. *Proceedings of the National Academy of Sciences of the United States of America*, *109*(7), 2678–83. <http://doi.org/10.1073/pnas.1117907109>
- Shen, G., & Vermaas, W. F. J. (1994). Chlorophyll in a *Synechocystis* sp. PCC 6803 mutant without photosystem I and photosystem II core complexes: Evidence for peripheral antenna chlorophylls in cyanobacteria. *Journal of Biological Chemistry*, *269*(19), 13904–13910.
